# Supplementary material for: Reversible vis-NIR electrochromic/electrofluorochromic switching in dual-functional devices modulated by different benzothiadiazole-arylamine anodic components
Source: Royal Society of Chemistry journal article supplement (doi:10.1039/d3tc03577h), 2023-01-01
Supplement: d3tc03577h1.pdf [file d3tc03577h1.pdf]

Supporting information

**Reversible vis-NIR electrochromic/electrofluorochromic switching in dual-functional devices modulated by different benzothiadiazole-arylammine anodic components**

Giuseppina Anna Corrente,\* Dora A. González, Ece Aktas, Agostina Lina Capodilupo, Francesco Ruighi, Gianluca Accorsi, Daniela Imbardelli, Cristina Rodriguez-Seco, Eugenia Martinez-Ferrero, Emilio Palomares, and Amerigo Beneduci\*

**Table S1.** Redox potential in Volts vs. AgCl/Ag of the benzothiadiazole arylamines<sup>a)</sup> and ethylviologen dibromide<sup>b)</sup>

| Compound | $E_{\max}(1)$ (mV) | $E_{\max}(2)$ (mV) | $\Delta E_{1}^{b)}$ (mV) | $K_c$             | $E_g^{opt}$ (eV) |
|----------|--------------------|--------------------|--------------------------|-------------------|------------------|
| CS03     | 0.62               | 0.95               | 358.2                    | $1.2 \times 10^6$ | 1.90             |
| CS01     | 0.77               | 1.08               | 302.1                    | $1.3 \times 10^5$ | 1.99             |
| LCS01    | 0.78               | 0.87               | 86                       | 29                | 2.19             |
| EP02     | 0.87               | 0.98               | 96                       | 42                | 2.3              |
| EV       | -0.63              | -1.15              | 413                      |                   |                  |

<sup>a)</sup>From Ref. 35. Measured at the maximum of the oxidation half-wave; <sup>b)</sup>From Ref. 38. Measured at the minimum of the reduction half-wave.

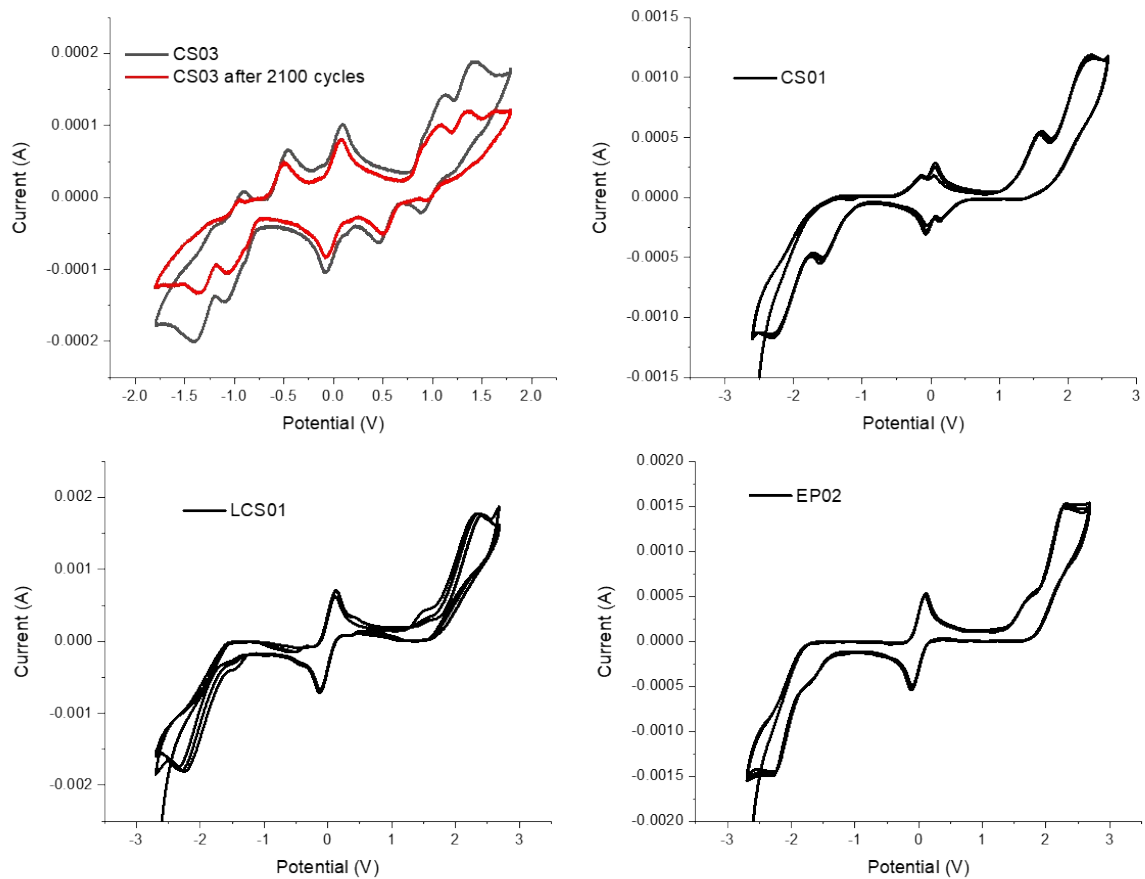

Figure S1. CVs covering the entire potential window of the BTDDPA and BTTPA devices. Please note that the peaks occurring at 0 V are not due to real electrochemical processes but are artifacts caused by the potential inversion.

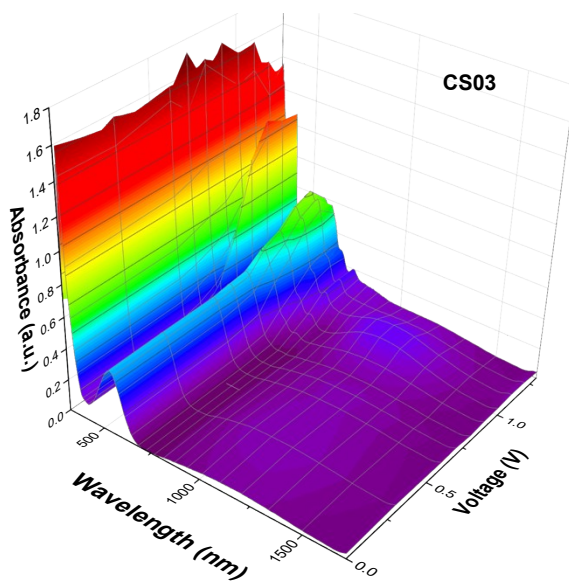

**Figure S2.** Spectroelectrochemistry in absorbance (3D plot) of the ITO/EC/ITO device with the anode CS03.

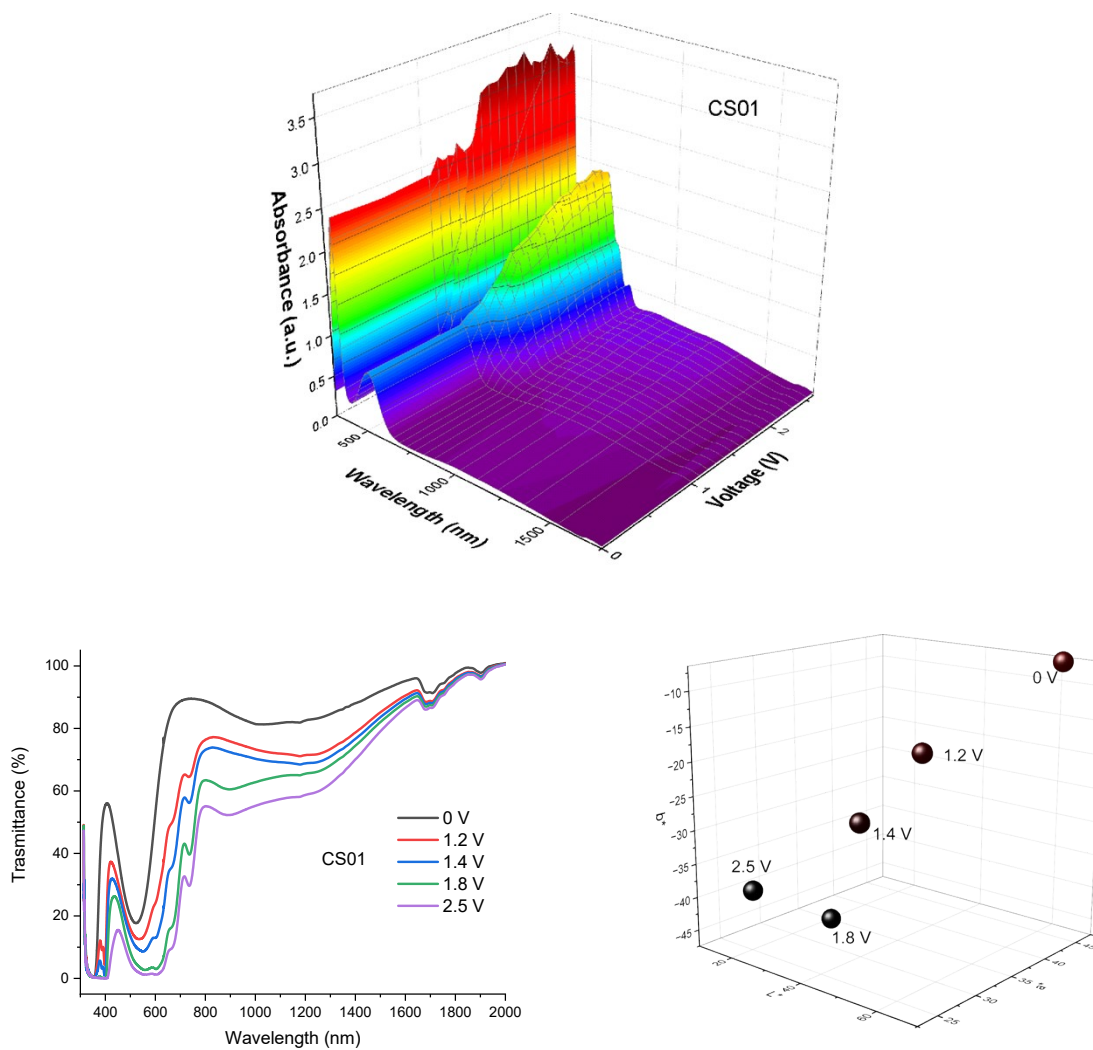

**Figure S3.** a) Spectroelectrochemistry in absorbance (3D plot) and b) in transmittance of the ITO/EC/ITO device with the anode CS01. c) 1976 CIE LAB coordinates as a function of the applied voltage for the device containing the CS01 anode.

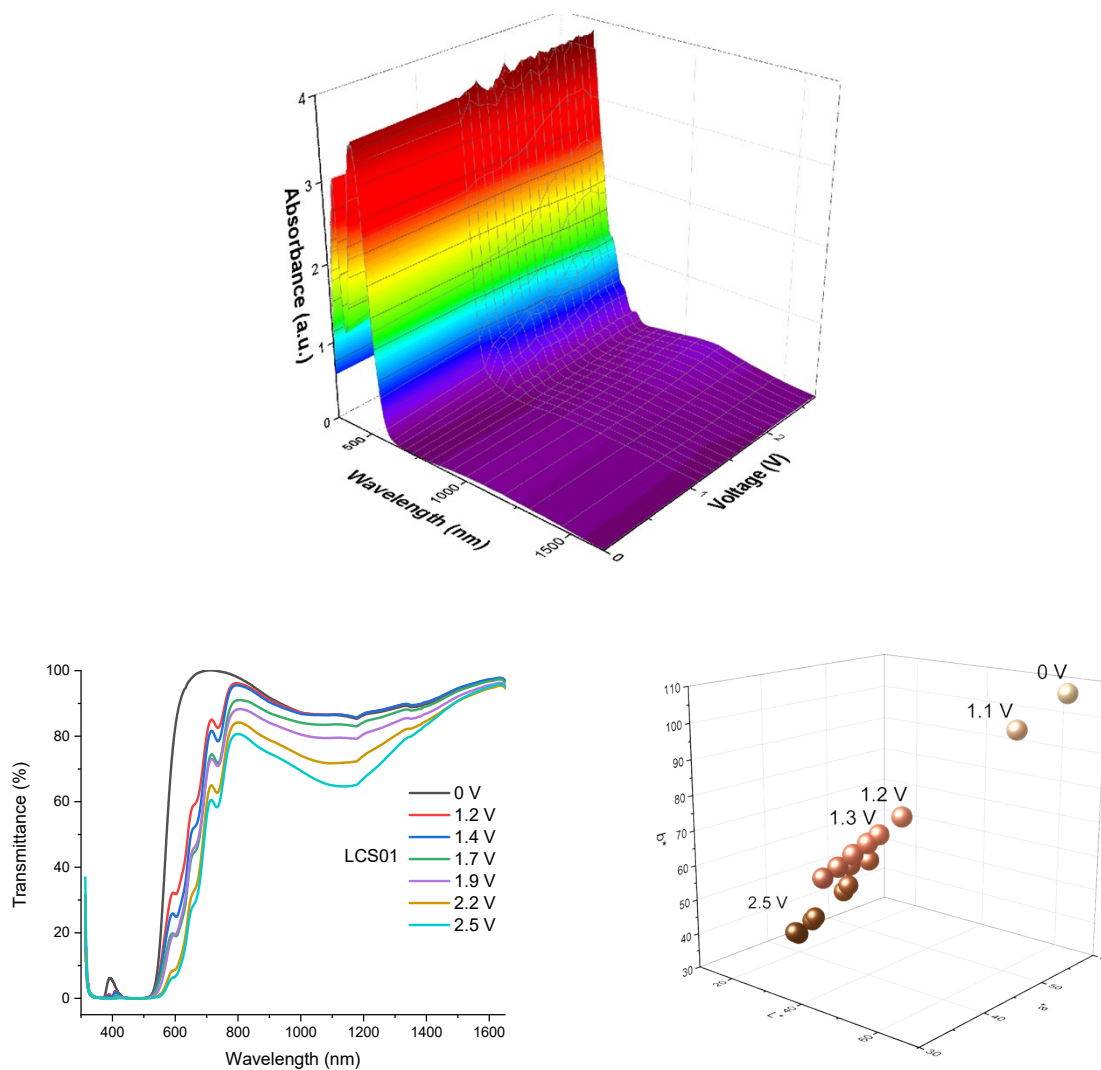

**Figure S4.** a) Spectroelectrochemistry in absorbance (3D plot) and b) in transmittance of the ITO/EC/ITO device with the anode LCS01. c) 1976 CIE LAB coordinates as a function of the applied voltage for the device containing the LCS01 anode.

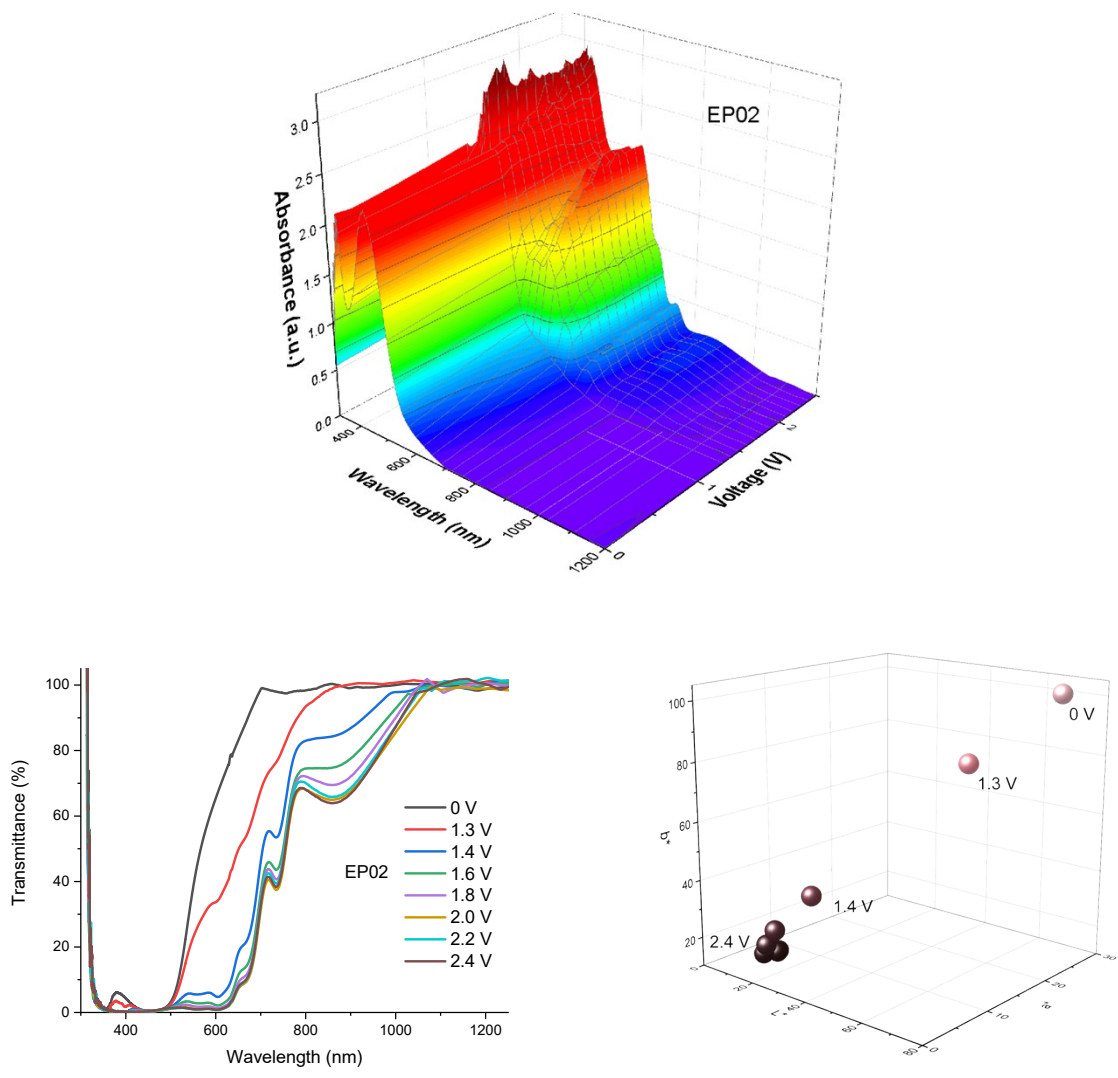

**Figure S5.** a) Spectroelectrochemistry in absorbance (3D plot) and b) in transmittance of the ITO/EC/ITO device with the anode EP02. c) 1976 CIE LAB coordinates as a function of the applied voltage for the device containing the EP02 anode.

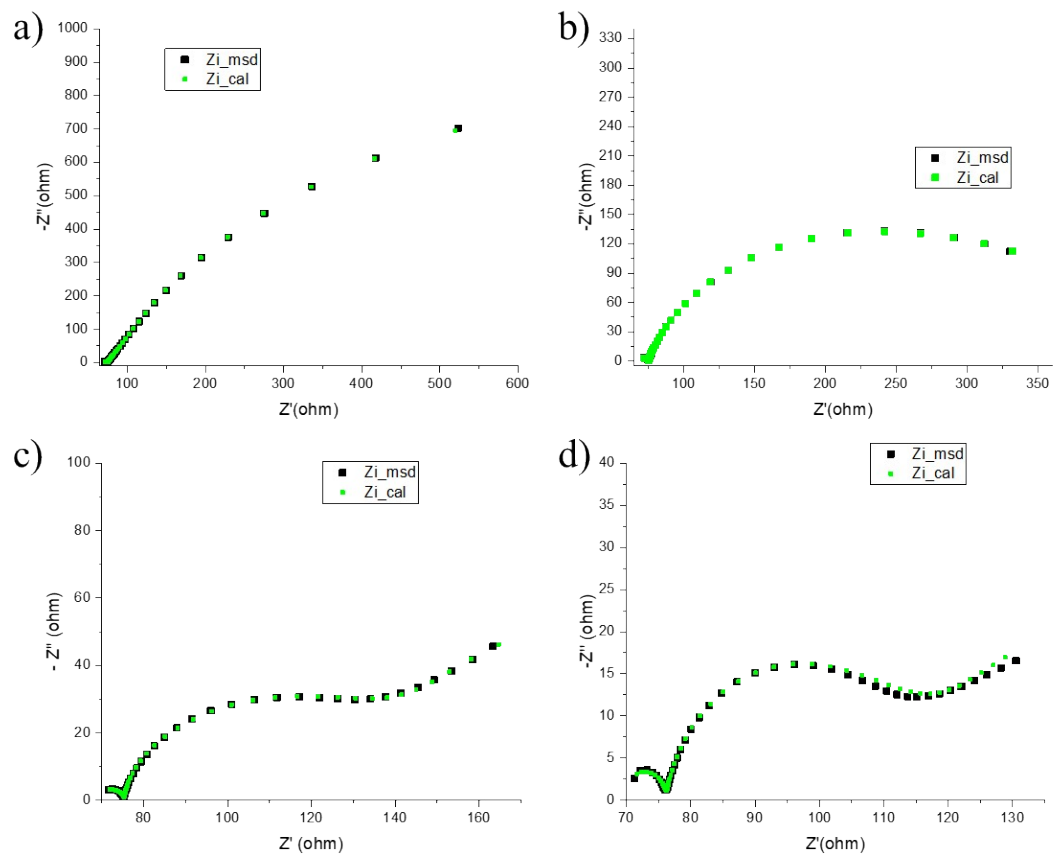

**Figure S6.** EIS experimental (black points) and calculated (green points) spectra of the CSO3-based device at the following voltages a) 0.6V, b) 0.8V, c) 1.2V and d) 1.6V.

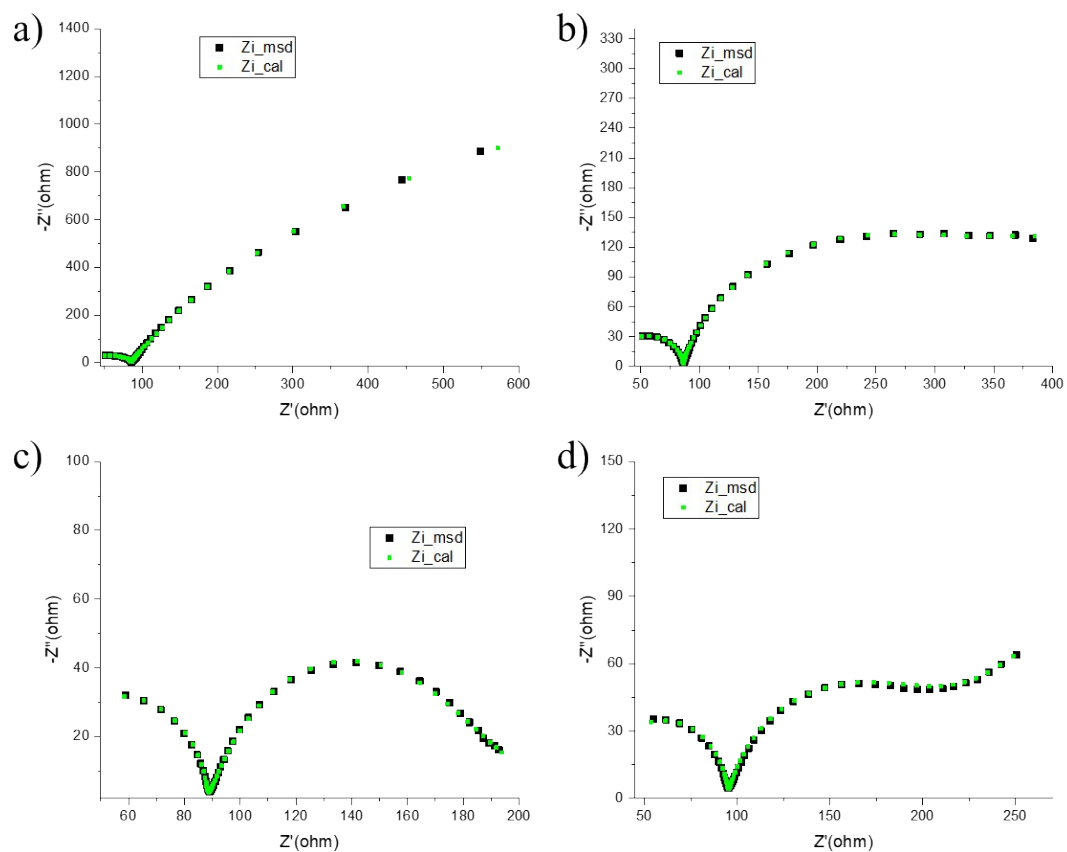

**Figure S7.** EIS experimental (black points) and calculated (green points) spectra of CS01-based device at the following voltages a) 0.8V, b) 1.2V, c) 1.9V and d) 2.4V.



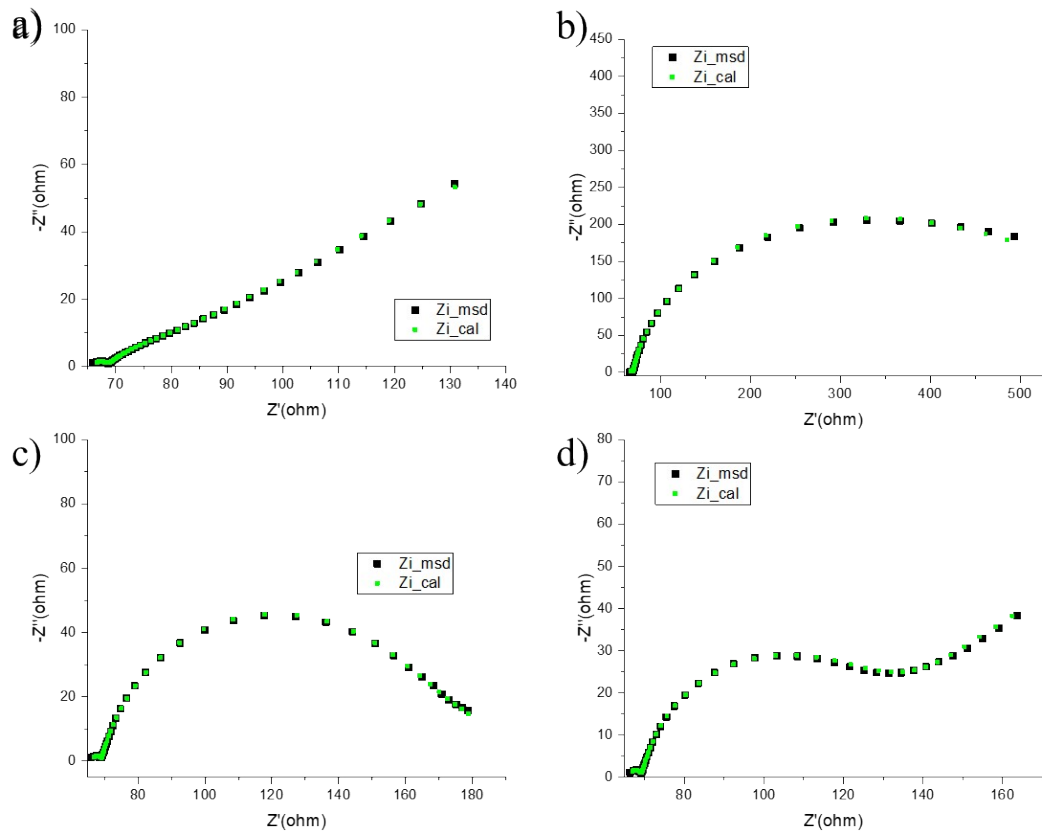

**Figure S8.** EIS experimental (black points) and calculated (green points) spectra of the EP02-based device at the following voltages a) 0V, b) 1.4, c) 1.6V and d) 2V.

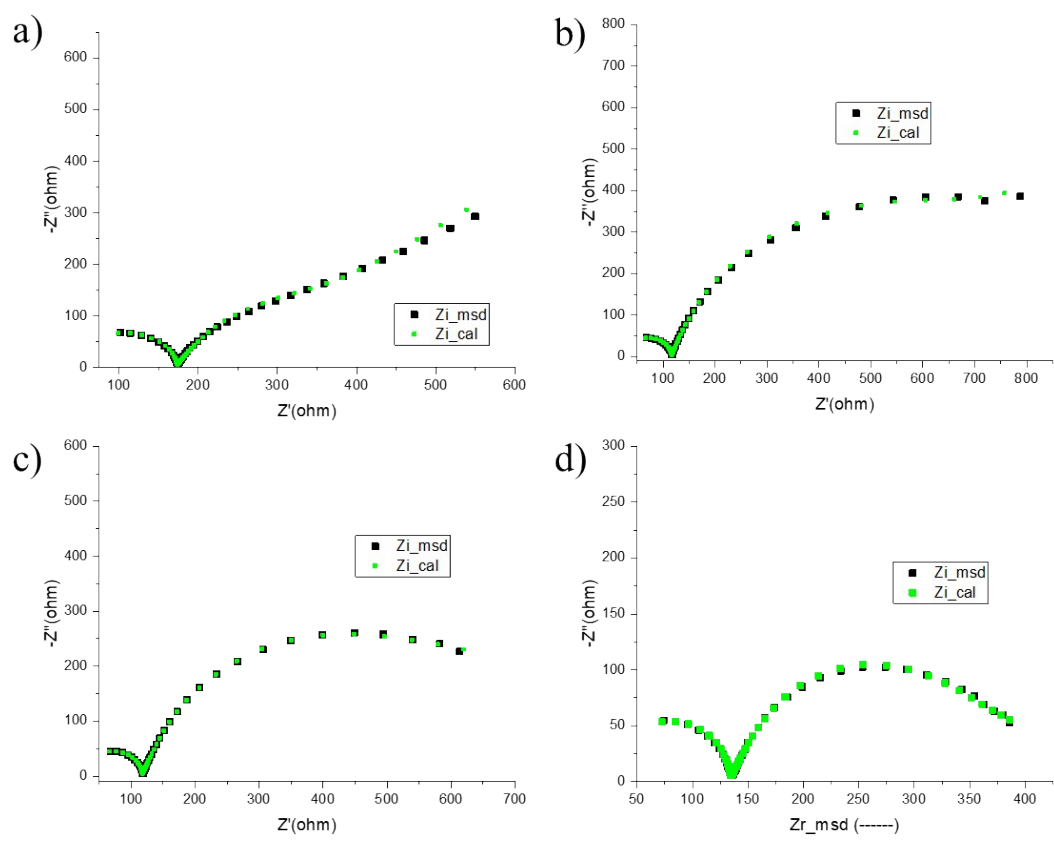

**Figure S9.** EIS experimental (black points) and calculated (green points) spectra of the LCS01-based device at the following voltages a) 0V, b) 1.4, c) 1.6V and d) 2.2V.

**Table S2.** EIS fitting parameters relative to the CS03 containing device as a function of the voltage.

| BIAS<br>(V) | C1<br>$\times 10^{-9}$<br>(F/cm <sup>2</sup> ) | R <sub>1</sub><br>(Ω/cm <sup>2</sup> ) | C2<br>$\times 10^{-6}$<br>(F/cm <sup>2</sup> ) | R <sub>2</sub><br>(Ω/cm <sup>2</sup> ) | W <sub>2FLY</sub><br>$\times 10^{-4}$ (U <sup>*</sup> ) | W <sub>2FLB</sub><br>(B <sup>**</sup> ) | W <sub>2Y</sub><br>$\times 10^{-4}$<br>(U <sup>*</sup> ) | C3<br>$\times 10^{-6}$<br>(F/cm <sup>2</sup> ) | R <sub>3</sub><br>(Ω/cm <sup>2</sup> ) | W <sub>3FLY</sub><br>$\times 10^{-4}$<br>(U <sup>*</sup> ) | W <sub>3FLB</sub><br>(B <sup>**</sup> ) | W <sub>3Y</sub><br>$\times 10^{-4}$<br>(U <sup>*</sup> ) | χ <sup>2</sup> |
|-------------|------------------------------------------------|----------------------------------------|------------------------------------------------|----------------------------------------|---------------------------------------------------------|-----------------------------------------|----------------------------------------------------------|------------------------------------------------|----------------------------------------|------------------------------------------------------------|-----------------------------------------|----------------------------------------------------------|----------------|
| 0.0         | 36.00                                          | 5.85                                   | 7.87                                           | 23250                                  |                                                         |                                         |                                                          | 5.24                                           |                                        | 4.70                                                       | 0.22                                    |                                                          | 1.4E-4         |
| 0.6         | 36.00                                          | 5.98                                   | 13.51                                          | 1226                                   |                                                         |                                         |                                                          | 13.51                                          |                                        | 4.36                                                       | 0.18                                    |                                                          | 8.4E-6         |
| 0.8         | 36.00                                          | <u>6.20</u>                            | 16.64                                          | 191.0                                  |                                                         |                                         |                                                          | 560                                            | 154                                    | 5.60                                                       | 0.10                                    |                                                          | 3.2E-6         |
| 1.0         | 36.00                                          | 6.23                                   | <u>949</u>                                     | 36.92                                  |                                                         |                                         |                                                          | <u>6.23</u>                                    | 85.47                                  |                                                            |                                         | 1.58                                                     | 1.2E-5         |
| 1.2         | 36.00                                          | 6.24                                   | <u>233.2</u>                                   | 96.93                                  |                                                         |                                         |                                                          | 5.08                                           | 83.37                                  |                                                            |                                         | 1.93                                                     | 1.0E-5         |
| 1.4         | 36.00                                          | <u>6.06</u>                            |                                                |                                        | 30.45                                                   | 0.39                                    |                                                          | 5.57                                           | 59.18                                  |                                                            |                                         | 1.85                                                     | 7.1E-6         |
| 1.6         | 36.00                                          | <u>6.44</u>                            |                                                |                                        | 57.67                                                   | 0.35                                    |                                                          | 5.85                                           | 38.86                                  |                                                            |                                         | 2.23                                                     | 1.2E-5         |

The calculated value for R, the resistance of the polymeric bulk blend, was 69 Ω

\*U= (F/sec<sup>0.5</sup>cm<sup>2</sup>)

\*\*B= (sec<sup>0.5</sup>/cm<sup>2</sup>)

**Table S3.** EIS fitting parameters relative to the CS01 containing device as a function of the voltage.

| BIAS<br>(V) | C1<br>$\times 10^{-9}$<br>(F/cm <sup>2</sup> ) | R <sub>1</sub><br>(Ω/cm <sup>2</sup> ) | C2<br>$\times 10^{-6}$<br>(F/cm <sup>2</sup> ) | R <sub>2</sub><br>(Ω/cm <sup>2</sup> ) | W <sub>2FLY</sub><br>$\times 10^{-4}$<br>(U <sup>*</sup> ) | W <sub>2FLB</sub><br>(B <sup>*</sup> ) | W <sub>2Y</sub><br>$\times 10^{-4}$<br>(U <sup>*</sup> ) | C3 $\times 10^{-6}$<br>(F/cm <sup>2</sup> ) | R <sub>3</sub><br>(Ω/cm <sup>2</sup> ) | W <sub>3FLY</sub><br>$\times 10^{-4}$<br>(U <sup>*</sup> ) | W <sub>3FLB</sub><br>(B <sup>**</sup> ) | W <sub>3Y</sub><br>$\times 10^{-4}$<br>(U <sup>*</sup> ) | χ <sup>2</sup> |
|-------------|------------------------------------------------|----------------------------------------|------------------------------------------------|----------------------------------------|------------------------------------------------------------|----------------------------------------|----------------------------------------------------------|---------------------------------------------|----------------------------------------|------------------------------------------------------------|-----------------------------------------|----------------------------------------------------------|----------------|
| 0.0         | 3.00                                           | 61.60                                  | 6.88                                           | 15180                                  |                                                            |                                        |                                                          | 7.27                                        |                                        | 5.25                                                       | 0.17                                    |                                                          | 8.7E-5         |
| 0.8         | 3.00                                           | 61.54                                  | 11.49                                          | 1751                                   |                                                            |                                        |                                                          | 4.75                                        |                                        | 3.29                                                       | 0.17                                    |                                                          | 1.3E-4         |
| 1.0         | 3.04                                           | <u>61.84</u>                           | 15.82                                          | 151.6                                  |                                                            |                                        |                                                          | 4.84                                        | 327                                    | 4.52                                                       | 0.17                                    |                                                          | 1.1E-4         |
| 1.2         | 3.10                                           | <u>61.10</u>                           | 18.36                                          | 119.1                                  |                                                            |                                        |                                                          | 5.66                                        | 559                                    |                                                            |                                         | 3.79                                                     | 7.1E-5         |
| 1.4         | 3.01                                           | 61.62                                  | <u>18.06</u>                                   | 85.72                                  |                                                            |                                        |                                                          | <u>3.97</u>                                 | 488                                    |                                                            |                                         | <u>3.40</u>                                              | 4.9E-5         |
| 1.7         | 2.96                                           | 62.27                                  | <u>14.19</u>                                   | 73.58                                  |                                                            |                                        |                                                          | <u>2.77</u>                                 | 125                                    |                                                            |                                         | <u>5.76</u>                                              | 4.0E-5         |
| 1.9         | 2.92                                           | 63.24                                  | <u>12.17</u>                                   | 56.43                                  |                                                            |                                        |                                                          | 2.58                                        | 68.90                                  |                                                            |                                         | 7.20                                                     | 2.2E-5         |
| 2.15        | 2.91                                           | <u>65.83</u>                           |                                                |                                        |                                                            |                                        | 31.82                                                    | 5.11                                        | 13.95                                  |                                                            |                                         | 1.48                                                     | 5.3E-5         |
| 2.4         | 2.79                                           | <u>68.27</u>                           |                                                |                                        |                                                            |                                        | 17.32                                                    | 4.86                                        | 11.38                                  |                                                            |                                         | 1.42                                                     | 7.1E-5         |

The calculated value for R, the resistance of the polymeric bulk blend, was 25 Ω

\*U= F/(sec<sup>0.5</sup>cm<sup>2</sup>)

\*\*B= (sec<sup>0.5</sup>/cm<sup>2</sup>)

**Table S4.** EIS fitting parameters relative to the LCS01 containing device as a function of the voltage.

| BIAS<br>(V) | C1<br>x10 <sup>-9</sup><br>(F/cm <sup>2</sup> ) | R <sub>1</sub><br>(Ω/cm <sup>2</sup> ) | C2<br>x10 <sup>-6</sup><br>(F/cm <sup>2</sup> ) | R <sub>2</sub><br>(Ω/cm <sup>2</sup> ) | W2 <sub>FLY</sub><br>x10 <sup>-4</sup><br>(U*) | W2 <sub>FLB</sub><br>(B*) | W2 <sub>Y</sub><br>x10 <sup>-4</sup><br>(U*) | C3<br>x10 <sup>-6</sup><br>(F/cm <sup>2</sup> ) | R <sub>3</sub><br>(Ω/cm <sup>2</sup> ) | W3 <sub>FLY</sub><br>x10 <sup>-4</sup><br>(U*) | W3 <sub>FLB</sub><br>(B**) | W3 <sub>Y</sub><br>x10 <sup>-4</sup><br>(U*) | χ <sup>2</sup> |
|-------------|-------------------------------------------------|----------------------------------------|-------------------------------------------------|----------------------------------------|------------------------------------------------|---------------------------|----------------------------------------------|-------------------------------------------------|----------------------------------------|------------------------------------------------|----------------------------|----------------------------------------------|----------------|
| 0.0         | 1.32                                            | 133.8                                  | 15.77                                           | 84.52                                  |                                                |                           |                                              | 1.61                                            |                                        |                                                |                            | 2.98                                         | 1.5E-4         |
| 1.0         | 2.03                                            | <u>88.81</u>                           | 10.86                                           | 74.09                                  |                                                |                           |                                              | 4.11                                            |                                        |                                                |                            | 3.31                                         | 1.1E-4         |
| 1.2         | 2.03                                            | <u>89.21</u>                           | 12.35                                           | q                                      |                                                |                           |                                              | 4.07                                            |                                        |                                                |                            | 3.72                                         | 1.2E-4         |
| 1.4         | 1.98                                            | <u>90.21</u>                           | 10.81                                           | 410.4                                  |                                                |                           |                                              | 3.06                                            |                                        |                                                |                            | 3.08                                         | 1.3E-4         |
| 1.6         | 1.98                                            | 90.76                                  | <u>9.51</u>                                     | 379.7                                  |                                                |                           |                                              | <u>2.67</u>                                     | 335                                    | 4.17                                           | 0.10                       |                                              | 3.9E-5         |
| 1.8         | 1.97                                            | <u>92.96</u>                           | <u>12.6</u>                                     | 217.9                                  |                                                |                           |                                              | 3.88                                            | 340                                    |                                                |                            | 3.64                                         | 1.0E-4         |
| 2.0         | 1.87                                            | <u>97.94</u>                           | <u>12.23</u>                                    | 151.9                                  |                                                |                           |                                              | 3.56                                            | 216                                    |                                                |                            | 4.09                                         | 8.4E-5         |
| 2.2         | 1.72                                            | <u>107.60</u>                          | <u>11.08</u>                                    | 139.1                                  |                                                |                           |                                              | 2.03                                            | 200                                    |                                                |                            | 4.85                                         | 7.9E-5         |

The calculated value for R, the resistance of the polymeric bulk blend, was 27 Ω

\*U= F/(sec<sup>0.5</sup>cm<sup>2</sup>)

\*\*B= (sec<sup>0.5</sup>/cm<sup>2</sup>)

**Table S5.** EIS fitting parameters relative to the EP02 containing device as a function of the voltage.

| BIAS<br>(V) | C1<br>x10 <sup>-9</sup><br>(F/cm <sup>2</sup> ) | R <sub>1</sub><br>(Ω/cm <sup>2</sup> ) | C2<br>x10 <sup>-6</sup><br>(F/cm <sup>2</sup> ) | R <sub>2</sub><br>(Ω/cm <sup>2</sup> ) | W2 <sub>FLY</sub><br>x10 <sup>-4</sup><br>(U*) | W2 <sub>FLB</sub><br>(B*) | W2 <sub>Y</sub><br>x10 <sup>-4</sup><br>(U*) | C3<br>x10 <sup>-6</sup><br>(F/cm <sup>2</sup> ) | R <sub>3</sub><br>(Ω/cm <sup>2</sup> ) | W3 <sub>FLY</sub><br>x10 <sup>-4</sup><br>(U*) | W3 <sub>FLB</sub><br>(B**) | W3 <sub>Y</sub><br>x10 <sup>-4</sup><br>(U*) | χ <sup>2</sup> |
|-------------|-------------------------------------------------|----------------------------------------|-------------------------------------------------|----------------------------------------|------------------------------------------------|---------------------------|----------------------------------------------|-------------------------------------------------|----------------------------------------|------------------------------------------------|----------------------------|----------------------------------------------|----------------|
| 0.0         | 134.0                                           | 2.35                                   |                                                 |                                        | 16.77                                          | 0.43                      |                                              | 11.76                                           | 9.53                                   |                                                |                            | 18.22                                        | 1.2E-5         |
| 1.1         | <u>134.0</u>                                    | <u>2.56</u>                            |                                                 |                                        | 20.69                                          | 0.35                      |                                              | 8.06                                            | 5459                                   |                                                |                            | 0.43                                         | 9.0E-6         |
| 1.4         | <u>134.5</u>                                    | <u>2.84</u>                            |                                                 |                                        | 32.70                                          | 0.15                      |                                              | 6.49                                            | 550.4                                  |                                                |                            | 0.68                                         | 4.3E-5         |
| 1.6         | 134.6                                           | <u>2.91</u>                            | <u>9.14</u>                                     | 69.44                                  |                                                |                           |                                              | 4.71                                            | 69.44                                  |                                                |                            | 9.59                                         | 1.6E-5         |
| 1.8         | <u>134.5</u>                                    | 2.68                                   |                                                 |                                        | 27.77                                          | 0.38                      |                                              | 5.29                                            | 66.31                                  |                                                |                            | 1.10                                         | 3.2E-5         |
| 2.0         | <u>134.4</u>                                    | <u>2.53</u>                            |                                                 |                                        | 24.31                                          | 0.37                      |                                              | 5.23                                            | 58.8                                   |                                                |                            | 1.20                                         | 1.6E-5         |

The calculated value for R, the resistance of the polymeric bulk blend, was 67 Ω

\*U= F/(sec<sup>0.5</sup>cm<sup>2</sup>)

\*\*B= (sec<sup>0.5</sup>/cm<sup>2</sup>)

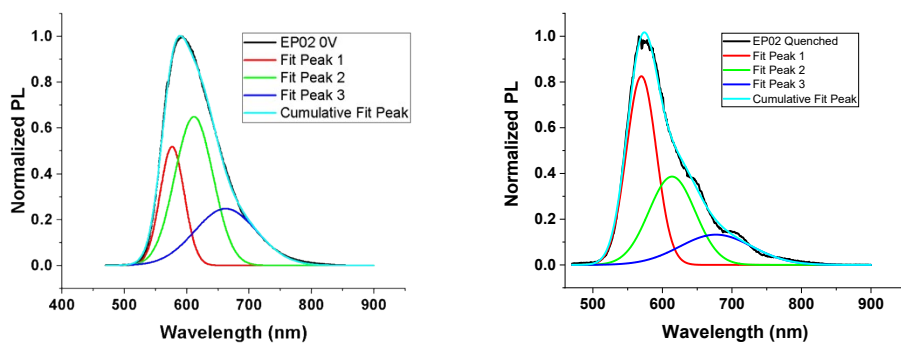

**Figure S10.** Deconvolution of the emission spectra of EP02-based device at 0.0V and 1.0V ( $\lambda_{\text{ex}} = 450 \text{ nm}$ ).

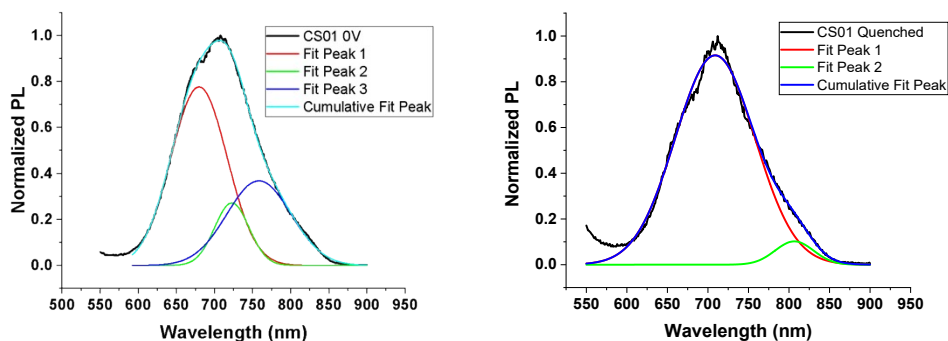

**Figure S11.** Deconvolution of the emission spectra of CS01-based device at 0.0V and 1.5V ( $\lambda_{\text{ex}} = 520 \text{ nm}$ ).

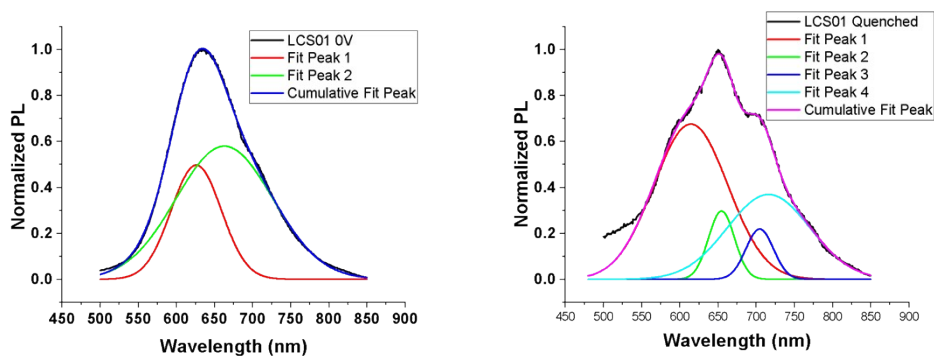

**Figure S12.** Deconvolution of the emission spectra of LCS01-based device at 0.0V and 1.6V ( $\lambda_{\text{ex}} = 480 \text{ nm}$ ).

**Table S6.** Contribution of each fluorescence band to the overall emission of compounds in the gel phase, calculated by the spectral deconvolution at 0V and in the voltage induced quenched state.

|       |          | A% <sub>peak1</sub><br>(λ nm) | A% <sub>peak2</sub><br>(λ nm) | A% <sub>peak3</sub><br>(λ nm) | A% <sub>peak4</sub><br>(λ nm) | R <sup>2</sup> | χ <sup>2</sup>       |
|-------|----------|-------------------------------|-------------------------------|-------------------------------|-------------------------------|----------------|----------------------|
| EP02  | 0,0 V    | 24<br>(577)                   | 47<br>(611)                   | 29<br>(662)                   |                               | 0.9993         | 7.4*10 <sup>-5</sup> |
|       | Quenched | 48<br>(570)                   | 34<br>(614)                   | 18<br>(677)                   |                               | 0.9977         | 2.1*10 <sup>-4</sup> |
| CS01  | 0,0 V    | 57<br>(680)                   | 12<br>(723)                   | 31<br>(758)                   |                               | 0.9992         | 9.8*10 <sup>-5</sup> |
|       | Quenched | 95<br>(709)                   | 5<br>(807)                    |                               |                               | 0.9849         | 1.5*10 <sup>-3</sup> |
| LCS01 | 0,0 V    | 31<br>(626)                   | 69<br>(663)                   |                               |                               | 0.9993         | 8.1*10 <sup>-5</sup> |
|       | Quenched | 54<br>(615)                   | 8<br>(655)                    | 6<br>(705)                    | 32<br>(716)                   | 0.9888         | 1.1*10 <sup>-4</sup> |
